# Supplementary material
Source: PubMed Central journal article supplement (PMC2708946)
Supplement: jc.2009-0147_1.pdf [file jc.2009-0147_1.pdf]

| <b>Supplemental Table 1. PCR primer pairs used to detect progestin binding proteins in GL and GL5 cells</b> |                                 |                                   |              |
|-------------------------------------------------------------------------------------------------------------|---------------------------------|-----------------------------------|--------------|
| Target Gene                                                                                                 | Forward Primer                  | Reverse Primer                    | Product Size |
| <i>PGR</i>                                                                                                  | GTGCAAGGTTGGAGACAGCT            | TTTGCCCTTCAGAAGCGGAC              | 213 bp       |
| <i>PGRMC1</i>                                                                                               | GCCTGGATAAGGAAGCACTG            | TAATCATTTCCTCCGGGCACT             | 202 bp       |
| <i>Paqr7</i>                                                                                                | CGCTCTTCTGGAAGCCGTAC<br>ATCTATG | CAGACGGTGGGTCCAGACAT<br>TCAC      | 100 bp       |
| <i>Paqr8</i>                                                                                                | GTCAACGTCTGGACCCATT             | GTGGGAGAGCTCTGACTTGG              | 192 bp       |
| <i>Paqr5</i>                                                                                                | CAGCTGTTTCACGTGTGTGT<br>GATCCTG | GGACAGAAGTATGGCTCCAG<br>CTATCTGAG | 120 bp       |
